# Supplementary material for: Clubhouse Model of Psychiatric Rehabilitation in China to Promote Recovery of People With Schizophrenia: A Systematic Review and Meta-Analysis
Source: Frontiers journal article supplement (doi:10.3389/fpsyt.2021.730552), 2021-09-13

**Figure S5: Pooled SMD about social functioning for patients with first-episode schizophrenia**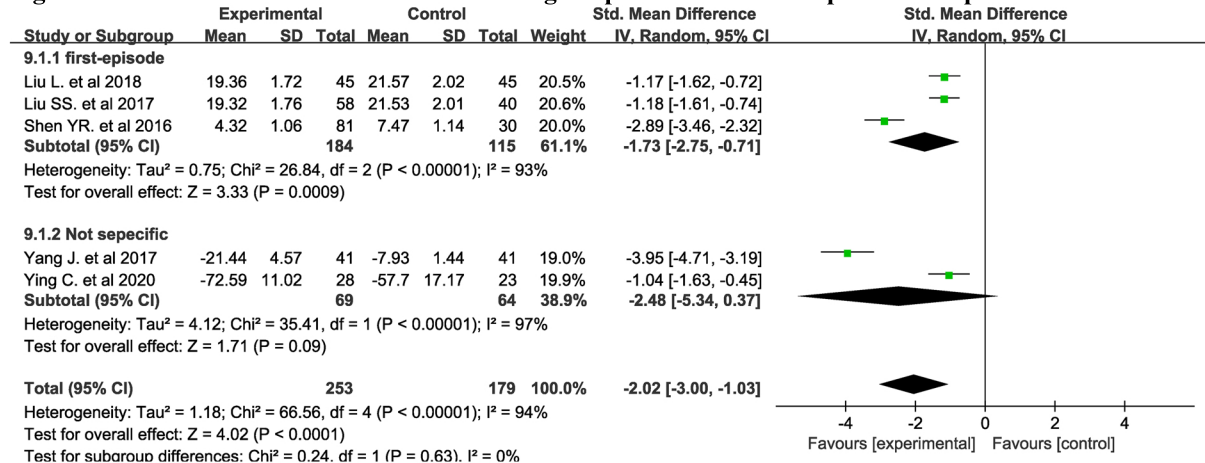

Supplement: Image_5.PDF [file Image_5.PDF]
