# Supplementary material for: Clubhouse Model of Psychiatric Rehabilitation in China to Promote Recovery of People With Schizophrenia: A Systematic Review and Meta-Analysis
Source: Frontiers journal article supplement (doi:10.3389/fpsyt.2021.730552), 2021-09-13

# Figure S10: Pooled SMD about quality of life which assessed at different time point

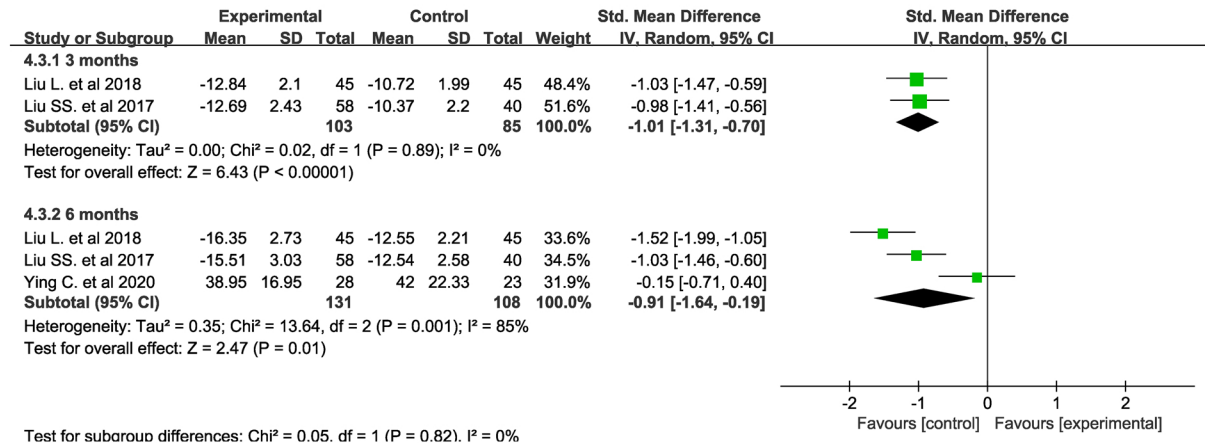

Supplement: Image_10.PDF [file Image_10.PDF]
